# Supplementary material
Source: publisher figshare collection journal article supplement (https://acs.figshare.com/ndownloader/files/5178850)
Supplement: Supplementary file 1 [file 5178850]

**REVISED**

-S1-

**Supporting Information for Bilirubin as Antioxidant: Kinetic Studies of  
the Reaction of Bilirubin with Peroxyl Radicals in Solution, Micelles  
and Lipid Bilayers**

Gillian L. Hatfield and L. Ross C. Barclay

REVISED

-S2-

**Table S1. Inhibition Rate Constants,  $k_{inh}$ , and Stoichiometric Factors,  $n$ , of Bilirubin, BR, Trolox, and PMHC for the Inhibited Oxidation of Methyl Linoleate, ML<sup>a</sup>, in 0.50 M SDS Micelles Initiated with ABAP<sup>b</sup> in Phosphate Buffer, pH 7.4 at 37 °C.**

| method <sup>c</sup> | inhibitor           | $R_i$                               | $\tau$               | $v^d$ | $k_{inh}$                                          | $n^e$ |
|---------------------|---------------------|-------------------------------------|----------------------|-------|----------------------------------------------------|-------|
|                     | M x 10 <sup>6</sup> | M s <sup>-1</sup> x 10 <sup>8</sup> | s x 10 <sup>-3</sup> | range | M <sup>-1</sup> s <sup>-1</sup> x 10 <sup>-4</sup> |       |
| OE                  | BR                  |                                     |                      |       |                                                    |       |
|                     | 4.93                | 1.04                                | 0.76                 | 26-35 | 5.2                                                | 1.6   |
|                     | 14.8                | 1.73                                | 1.16                 | 12-14 | 5.0                                                | 1.4   |
| PT                  | BR                  |                                     |                      |       |                                                    |       |
|                     | 39.0                | 1.93                                | 9.89                 | 2-6   | 4.7                                                | 1.3   |
| OE                  | Trolox              |                                     |                      |       |                                                    |       |
|                     | 14.8                | 1.40                                | 2.09                 | 9-13  | 4.2                                                | 2     |
|                     | 14.8                | 1.73                                | 1.70                 | 7-11  | 4.6                                                | 2     |
| PT                  | Trolox              |                                     |                      |       |                                                    |       |
|                     | 81.2                | 1.93                                | 8.42                 | 1-5   | 5.6                                                | 2     |
| PT                  | PMHC                |                                     |                      |       |                                                    |       |
|                     | 8.15                | 1.59                                | 1.03                 | 13-21 | 4.9                                                | 2     |

<sup>a</sup> ML, 0.193 M on OE, 0.440 ± 0.049 M on PT.

<sup>b</sup> ABAP, 30.6 ± 1.3 mM on OE, 18.7 ± 2.6 mM on PT. Concentrations calculated for the micellar volume in 3.0 ml of 0.50 M SDS used with the OE and 2.0 ml with the PT method.<sup>10b</sup>

<sup>c</sup> OE refers to the oxygen electrode, PT the pressure transducer.

**REVISED**

-S3-

<sup>d</sup> Kinetic chain length range during inhibition period.

<sup>e</sup> The stoichiometric value for Trolox and PMHC, is 2. The value for BR was calculated from  $n = R_i \times \tau / [BR]$  where  $R_i = 2 \times [ArOH] / \tau$  and  $\tau$  is the induction period of Trolox or PMHC.

**REVISED**

-S4-

**Table S2. Inhibition Rate Constants,  $k_{\text{inh}}$ , and Stoichiometric Factors,  $n$ , of BR, and Trolox for the Inhibited Oxidation of PLPC Bilayers Initiated with DMVN at 37 °C, pH 7.4<sup>a</sup>.**

| method <sup>b</sup> | inhibitor       | $R_i$                          | $\tau$             | $v^c$ | $k_{\text{inh}}$                       | $n^d$ |
|---------------------|-----------------|--------------------------------|--------------------|-------|----------------------------------------|-------|
|                     | $M \times 10^3$ | $M \text{ s}^{-1} \times 10^8$ | $s \times 10^{-3}$ | range | $M^{-1} \text{ s}^{-1} \times 10^{-3}$ |       |
| Coevap.             | BR, 0.466       | 2.60                           | 33.4               | 9-19  | 3.0                                    | 1.9   |
| Coevap.             | BR, 0.466       | 2.10                           | 38.9               | 9-18  | 3.2                                    | 1.8   |
| Injected            | Trolox, 0.161   | 2.10                           | 15.0               | 4-11  | 10.4                                   | 2     |
| Injected            | Trolox, 0.162   | 2.60                           | 12.1               | 5-8   | 10.7                                   | 2     |

<sup>a</sup> Concentrations were PLPC, 1.06 M; DMVN, 0.226 M. calculated for the bilayer lipid volume.<sup>10a</sup>

<sup>b</sup> Coevap. refers to coevaporation of BR with PLPC. The Trolox was injected in the phosphate buffer solution.

<sup>c</sup> The kinetic chain length range during the inhibition period.

<sup>d</sup> The stoichiometric factors relative to  $n = 2$  for Trolox, see Table S1, footnote e.
